# Supplementary material
Source: MDPI journal article supplement (https://www.mdpi.com/search?q=materials-12-00229)
Supplement: s001 [file materials-12-00229-s001.pdf]

Supplementary Information

# Nepafenac-Loaded Cyclodextrin/Polymer Nanoaggregates: A New Approach to Eye Drop Formulation

Blanca Lorenzo-Veiga, Hakon Hrafn Sigurdsson \* and Thorsteinn Loftsson

Faculty of Pharmaceutical Sciences, University of Iceland, Hofsvallagata 53, IS-107 Reykjavik, Iceland; blv3@hi.is (B.L.-V.); thorstlo@hi.is (T.L.)

\* Correspondence: hhs@hi.is; Tel.: +354-525-5821

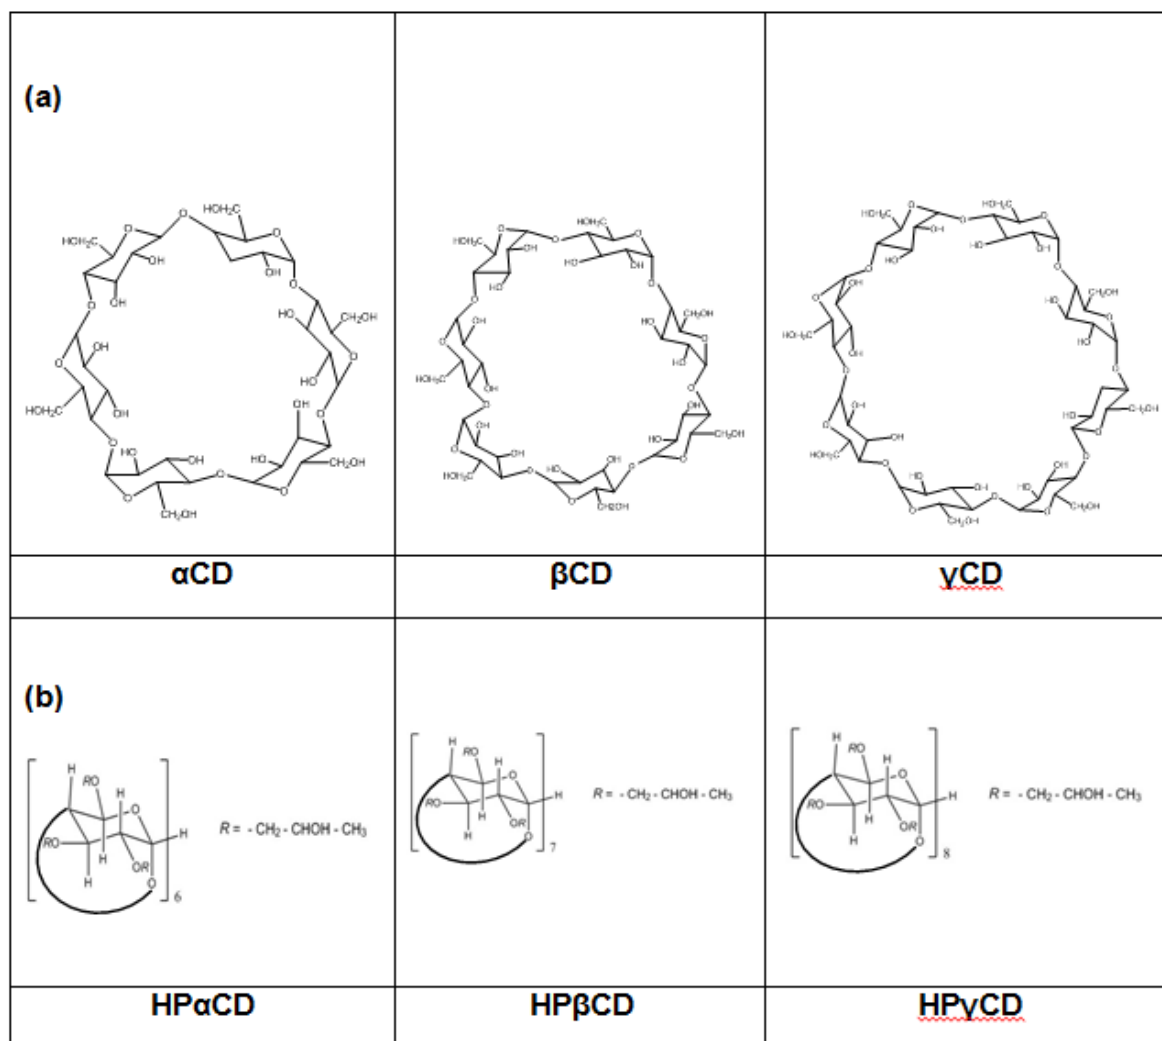

**Figure S1.** Chemical structure of (a) natural cyclodextrins ( $\alpha$ -,  $\beta$ - and  $\gamma$ -CDs) and (b) their hydroxyl-propyl derivatives (HP $\alpha$ -, HP $\beta$ - and HP $\gamma$ -CDs).

(a)

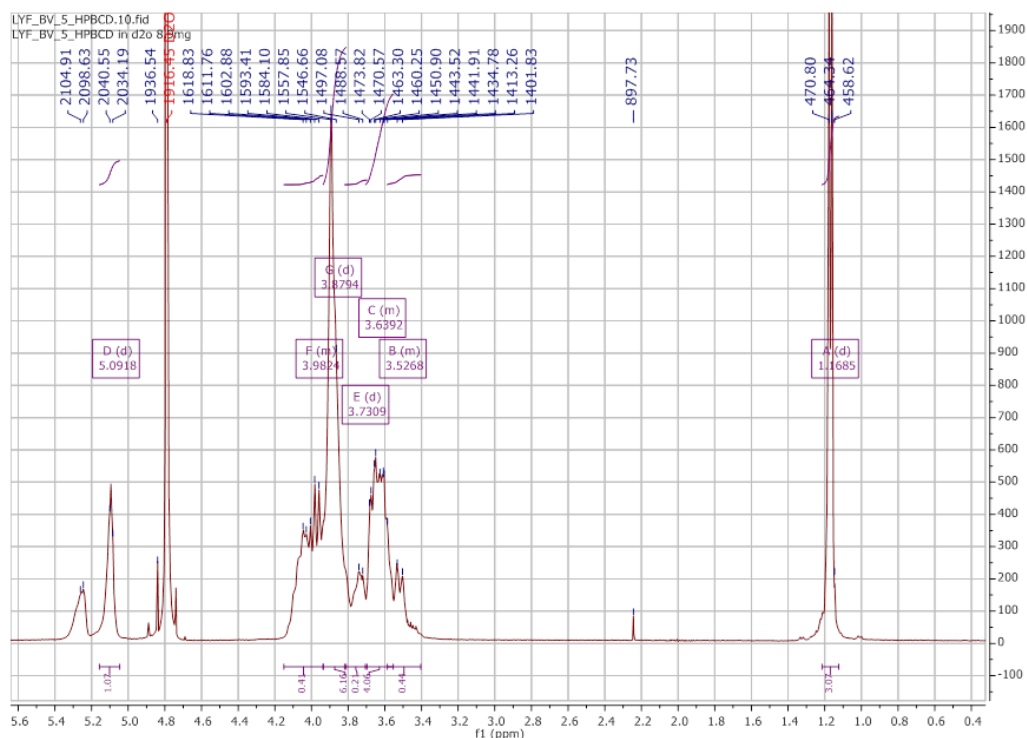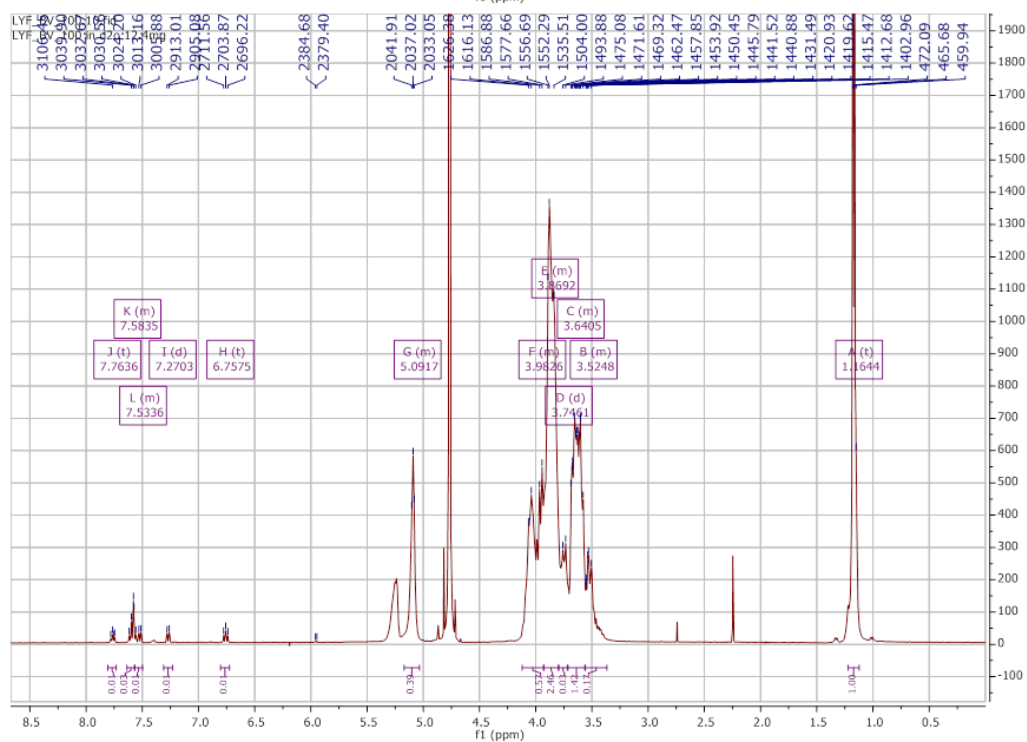

(b)

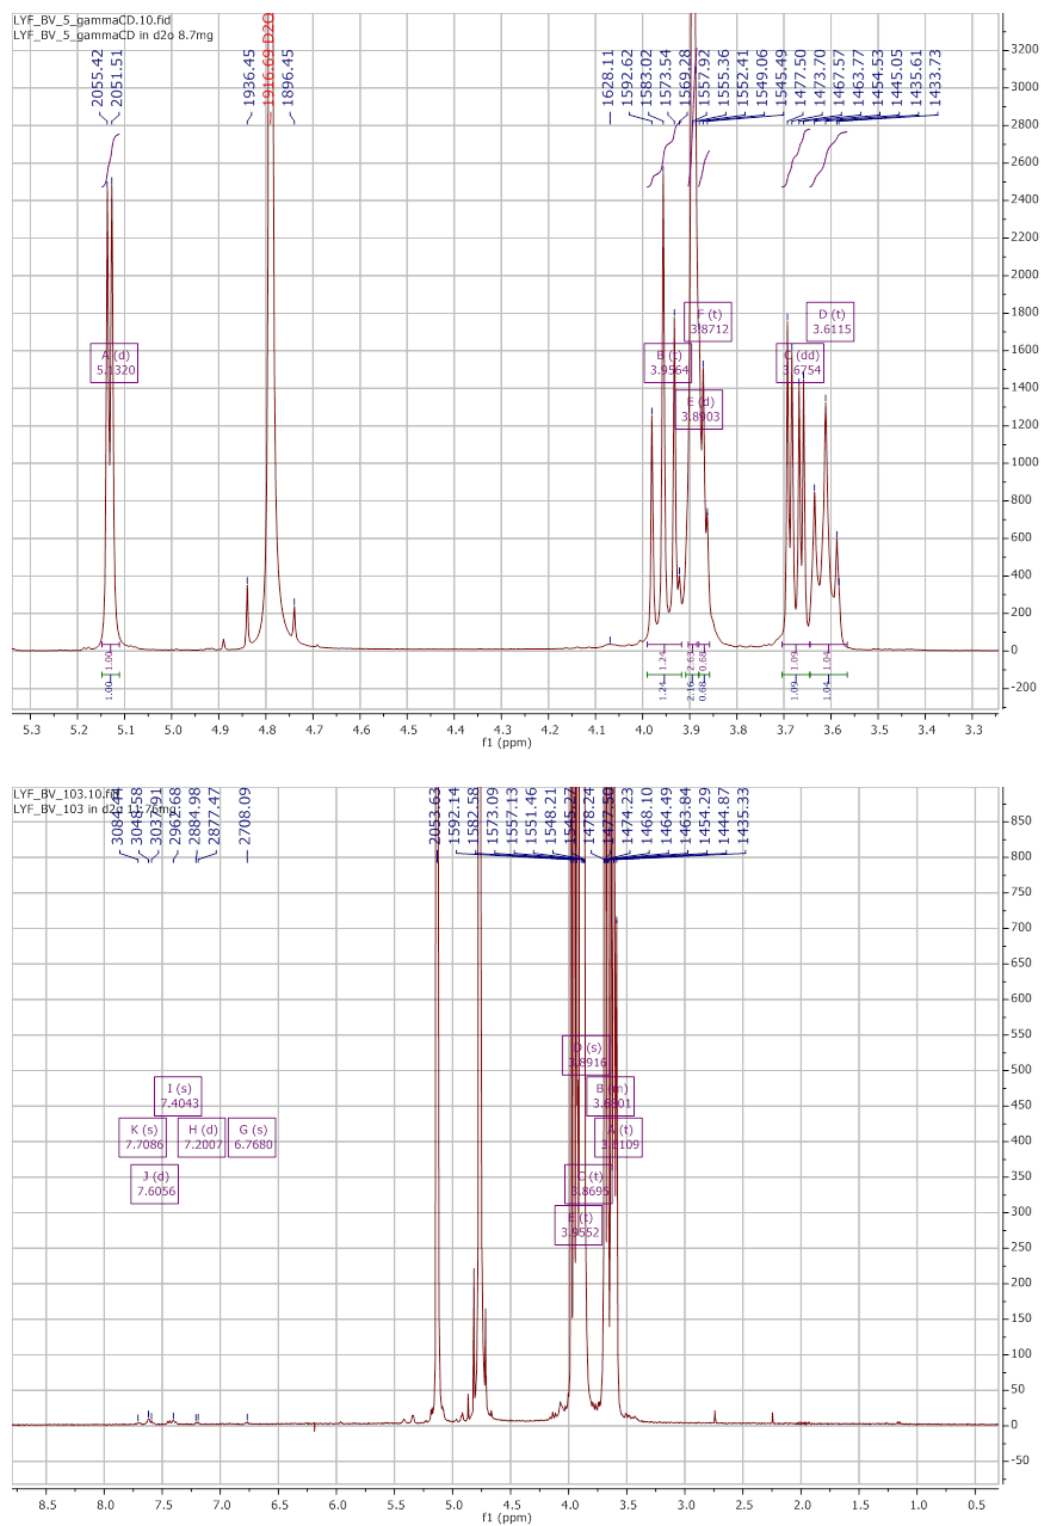

Figure S2. H-NMR spectra of (a) HP $\beta$ CD alone (top) and their complex (bottom), and (b)  $\gamma$ CD alone (top) and their complex (bottom).

**Table S1.** Effect of cyclodextrins and excipients on osmolality, viscosity and size of binary and ternary systems with nepafenac.

| Cyclodextrin                          | Excipient   | Osmolality (mOsm/kg) | Viscosity (cP)   | Size (nm)* |
|---------------------------------------|-------------|----------------------|------------------|------------|
| 15% $\gamma$ CD                       | No additive | 120 $\pm$ 0          | 1.89 $\pm$ 0.38  | 220.3      |
|                                       | PVA         | 140 $\pm$ 1          | 3.20 $\pm$ 0.02  | 296.1      |
|                                       | PVP         | 161 $\pm$ 1          | 3.22 $\pm$ 0.04  | 163.6      |
|                                       | Tyloxapol   | 117 $\pm$ 2          | 2.22 $\pm$ 0.02  | 230.7      |
|                                       | CMC         | 166 $\pm$ 1          | 4.34 $\pm$ 0.23  | 322        |
| 15% $\gamma$ CD/2.5%H<br>P $\beta$ CD | No additive | 71 $\pm$ 1           | 1.40 $\pm$ 0.06  | 277.8      |
|                                       | PVA         | 117 $\pm$ 1          | 2.89 $\pm$ 0.06  | 279.2      |
|                                       | PVP         | 125 $\pm$ 2          | 1.93 $\pm$ 0.02  | 281.7      |
|                                       | Tyloxapol   | 102 $\pm$ 2          | 1.69 $\pm$ 0.02  | 317        |
|                                       | CMC         | 133 $\pm$ 3          | 6.92 $\pm$ 0.1   | 317        |
| 15% $\gamma$ CD/<br>5%HP $\beta$ CD   | No additive | 88 $\pm$ 2           | 1.54 $\pm$ 0.02  | 180.8      |
|                                       | PVA         | 158 $\pm$ 1          | 3.16 $\pm$ 0.01  | 547        |
|                                       | PVP         | 149 $\pm$ 0          | 2.02 $\pm$ 0.10  | 306        |
|                                       | Tyloxapol   | 130 $\pm$ 2          | 1.83 $\pm$ 0.02  | 1466       |
|                                       | CMC         | 166 $\pm$ 2          | 11.00 $\pm$ 0.10 | 459        |
| 15% $\gamma$ CD/<br>8%HP $\beta$ CD   | No additive | 101 $\pm$ 2          | 1.53 $\pm$ 0.02  | 161.2      |
|                                       | PVA         | 219 $\pm$ 1          | 4.37 $\pm$ 0.05  | 246.5      |
|                                       | PVP         | 220 $\pm$ 2          | 2.37 $\pm$ 0.06  | 1524       |
|                                       | Tyloxapol   | 204 $\pm$ 2          | 2.37 $\pm$ 0.02  | 730        |
|                                       | CMC         | 238 $\pm$ 2          | 16.00 $\pm$ 0    | 319        |

\* The diameter of the mean population (nm) is displayed.

**Table S2.** Chemical shift corresponding to free nepafenac alone and in the presence of  $\gamma$ CD or HP $\beta$ CD.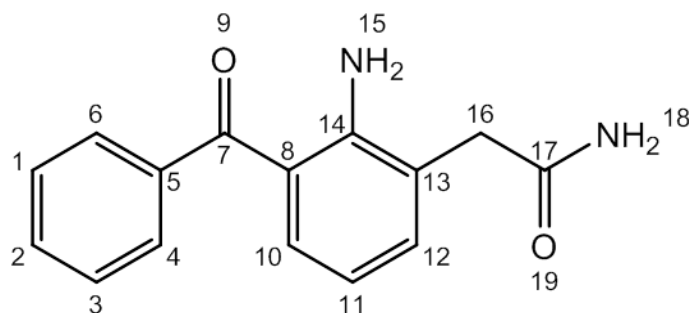

| Protons | Nepafenac | Nepafenac/HP $\beta$ CD | $\Delta\delta^*$ | Nepafenac | Nepafenac/ $\gamma$ CD | $\Delta\delta^*$ |
|---------|-----------|-------------------------|------------------|-----------|------------------------|------------------|
| H-4     | 7.6301    | 7.7301                  | 0.1              | 7.6301    | 7.7856                 | 0.1555           |
| H-6     | 7.6301    | 7.7316                  | 0.1015           | 7.6301    | 7.7856                 | 0.1555           |
| H-2     | 7.5236    | 7.6286                  | 0.105            | 7.5236    | 7.6055                 | 0.0819           |
| H-3     | 7.4513    | 7.4273                  | -0.024           | 7.4513    | 7.5556                 | 0.1043           |
| H-1     | 7.4513    | 7.4273                  | -0.024           | 7.4513    | 7.5556                 | 0.1043           |
| H-12    | 7.2373    | 7.2237                  | -0.0136          | 7.2373    | 7.2973                 | 0.06             |
| H-11    | 6.8189    | 6.7910                  | -0.0279          | 6.8189    | 6.7793                 | -0.0396          |
| H-16    | 3.5635    | *                       | *                | 3.5635    | *                      | *                |

\* Due to the overlapping of CD protons, it is not possible to access the resonance of proton.
